# Supplementary material for: Quality Characteristics of Oolong Tea Products in Different Regions and the Contribution of Thirteen Phytochemical Components to Its Taste
Source: MDPI journal article supplement (doi:10.3390/horticulturae8040278), 2022-03-24
Supplement: s1 [file s1]

**Table S1 Information of Oolong tea samples in different regions**

| Sample source          | Sample number (representative samples for phytochemical components and sensory evaluation) | Oolong tea name                   |
|------------------------|--------------------------------------------------------------------------------------------|-----------------------------------|
| Southern Fujian, China | MN-1                                                                                       | Meizhan                           |
|                        | MN-2 (MN1)                                                                                 | Dangui                            |
|                        | MN-3 (MN2)                                                                                 | Dayewuyulong                      |
|                        | MN-4 (MN3)                                                                                 | Jinguanyin                        |
|                        | MN-5 (MN4)                                                                                 | Tieguanyin                        |
|                        | MN-6 (MN5)                                                                                 | Huangdan                          |
|                        | MN-7 (MN6)                                                                                 | Maoxie                            |
|                        | MN-8 (MN7)                                                                                 | Benshan                           |
|                        | MN-9                                                                                       | Baiyaqilan (refreshing fragrance) |
|                        | MN-10                                                                                      | Baiyaqilan (strong fragrance)     |
|                        | MN-11                                                                                      | Zhaoan Baxian tea                 |
|                        | MN-12                                                                                      | Baxian tea (spring tea)           |
|                        | MN-13                                                                                      | Baxian tea (spring tea)           |
|                        | MN-14                                                                                      | Baxian tea (autumn tea)           |
|                        | MN-15                                                                                      | Baxian tea (autumn tea)           |
|                        | MN-16                                                                                      | Baxian tea (autumn tea)           |
|                        | MN-17                                                                                      | Tieguanyin (second level)         |
|                        | MN-18                                                                                      | Sezhong (second level)            |
|                        | MN-19                                                                                      | Foshou (second level)             |
|                        | MN-20                                                                                      | Shuixian (second level)           |
|                        | MN-21                                                                                      | Tieguanyin (super level) Y300     |
|                        | MN-22                                                                                      | Tieguanyin (first level) Y31      |
|                        | MN-23                                                                                      | Tieguanyin (second level) Y302    |
|                        | MN-24                                                                                      | Tieguanyin (third level) Y303     |
|                        | MN-25                                                                                      | Tieguanyin (four level) Y304      |
|                        | MN-26                                                                                      | Tieguanyin (first level) S101     |
|                        | MN-27                                                                                      | Tieguanyin (second level) S102    |
|                        | MN-28                                                                                      | Tieguanyin (third level) S103     |
|                        | MN-29                                                                                      | Tieguanyin (four level) S104      |
| Northern Fujian, China | MB-1                                                                                       | Rougui (Pucheng County)           |
|                        | MB-2 (MB1)                                                                                 | Jinmudan (Pucheng County)         |
|                        | MB-3 (MB2)                                                                                 | Dahongpao (Pucheng County)        |
|                        | MB-4                                                                                       | Wuyi Rock tea (Kaiminxuan)        |
|                        | MB-5                                                                                       | Wuyi Rock tea (Kaiminxuan)        |
|                        | MB-6                                                                                       | Wuyi Rock tea (Kaiminxuan)        |
|                        | MB-7                                                                                       | Wuyi Rock tea (Kaiminxuan)        |
|                        | MB-8 (MB3)                                                                                 | Rougui (Wuyixing super level)     |
|                        | MB-9 (MB4)                                                                                 | Rougui (Wuyixing first level)     |
|                        | MB-10 (MB5)                                                                                | Rougui (Wuyixing second level)    |

|                       |             |                                                           |
|-----------------------|-------------|-----------------------------------------------------------|
| Western Fujian, China | MB-11 (MB6) | Shuixian (Wuyixing super level)                           |
|                       | MB-12 (MB7) | Shuixian (Wuyixing first level)                           |
|                       | MB-13 (MB8) | Shuixian (Wuyixing second level)                          |
|                       | MB-14       | Dahongpao (Wuyixing super level)                          |
|                       | MB-15       | Dahongpao (Wuyixing first level)                          |
|                       | MB-16       | Dahongpao (Wuyixing second level)                         |
|                       | MB-17       | Dahongpao                                                 |
|                       | MB-18       | Dahongpao                                                 |
|                       | MB-19       | Dahongpao                                                 |
|                       | MB-20       | Dahongpao                                                 |
|                       | MB-21       | Shuixian (woodiness)                                      |
|                       | MB-22       | Shuixian (woodiness)                                      |
|                       | MB-23       | Shuixian (woodiness)                                      |
|                       | MB-24       | Shuixian (woodiness)                                      |
|                       | MB-25       | Shuixian (moss smell)                                     |
|                       | MB-26       | Shuixian (moss smell)                                     |
|                       | MB-27       | Shuixian (moss smell)                                     |
|                       | MB-28       | Shuixian (moss smell)                                     |
|                       | MB-29       | Shuixian (zongye flavor)                                  |
|                       | MB-30       | Shuixian (zongye flavor)                                  |
|                       | MB-31       | Shuixian (zongye flavor)                                  |
|                       | MB-32       | Shuixian (zongye flavor)                                  |
|                       | MB-33       | Shuixian (zongye flavor)                                  |
|                       | MB-34       | Shuixian (zongye flavor)                                  |
|                       | MB-35       | Shuixian (zongye flavor)                                  |
|                       | MB-36       | Shuixian (zongye flavor)                                  |
|                       | MX-1 (MX1)  | Zhangping Shuixian                                        |
|                       | MX-2        | Cuiyu                                                     |
|                       | MX-3        | Jinxuan                                                   |
|                       | MX-4        | Sijichun                                                  |
|                       | MX-5        | Ruanzhiwulong                                             |
|                       | MX-6 (MX2)  | Dongfangmeiren                                            |
|                       | MX-7        | Zhangping Oolong Tea (refreshing fragrance, super level ) |
|                       | MX-8        | Zhangping Oolong Tea (refreshing fragrance, super level ) |
|                       | MX-9        | Zhangping Oolong Tea (refreshing fragrance, super level ) |
|                       | MX-10 (MX3) | Zhangping Oolong Tea (refreshing fragrance, super level ) |
|                       | MX-11       | Zhangping Oolong Tea (refreshing fragrance, super level ) |
|                       | MX-12       | Zhangping Oolong Tea (refreshing fragrance, super level ) |
|                       | MX-13       | Zhangping Oolong Tea (refreshing fragrance, first level ) |
|                       | MX-14       | Zhangping Oolong Tea (refreshing fragrance, first level ) |
|                       | MX-15       | Zhangping Oolong Tea (refreshing fragrance, first level ) |
|                       | MX-16       | Zhangping Oolong Tea (refreshing fragrance, first level ) |
|                       | MX-17 (MX4) | Zhangping Oolong Tea (refreshing fragrance, first level ) |
|                       | MX-18       | Zhangping Oolong Tea (refreshing fragrance, first level ) |

|                  |             |                                                           |
|------------------|-------------|-----------------------------------------------------------|
| Guangdong, China | MX-19       | Zhangping Oolong Tea (refreshing fragrance, first level ) |
|                  | MX-20       | Zhangping Oolong Tea (refreshing fragrance, first level ) |
|                  | MX-21       | Zhangping Oolong Tea (refreshing fragrance, first level ) |
|                  | MX-22       | Zhangping Oolong Tea (strong fragrance, super level )     |
|                  | MX-23       | Zhangping Oolong Tea (strong fragrance, super level )     |
|                  | MX-24       | Zhangping Oolong Tea (strong fragrance, super level )     |
|                  | MX-25       | Zhangping Oolong Tea (strong fragrance, super level )     |
|                  | MX-26       | Zhangping Oolong Tea (strong fragrance, super level )     |
|                  | MX-27 (MX5) | Zhangping Oolong Tea (strong fragrance, first level )     |
|                  | MX-28       | Zhangping Oolong Tea (strong fragrance, first level )     |
|                  | MX-29       | Zhangping Oolong Tea (strong fragrance, first level )     |
|                  | MX-30       | Zhangping Oolong Tea (strong fragrance, first level )     |
|                  | MX-31       | Zhangping Oolong Tea (strong fragrance, first level )     |
|                  | MX-32       | Zhangping Oolong Tea (strong fragrance, second level )    |
|                  | MX-33       | Zhangping Oolong Tea (strong fragrance, second level )    |
|                  | MX-34       | Zhangping Oolong Tea (strong fragrance, second level )    |
|                  | MX-35       | Zhangping Oolong Tea (strong fragrance, second level )    |
|                  | MX-36       | Zhangping Oolong Tea (strong fragrance, second level )    |
|                  | GD-1 (GD1)  | Shuixian (super level)                                    |
|                  | GD-2 (GD2)  | Shuixian (first level)                                    |
|                  | GD-3 (GD3)  | Dancong (super level)                                     |
|                  | GD-4 (GD4)  | Dancong (first level)                                     |
|                  | GD-5 (GD5)  | Dancong (second level)                                    |
|                  | GD-6        | Guihuaxiang                                               |
|                  | GD-7        | Dachashu                                                  |
|                  | GD-8 (GD6)  | Heimeiren                                                 |
|                  | GD-9        | Baiyedancong 1 (super level)                              |
|                  | GD-10 (GD7) | Baiyedancong 2 (super level)                              |
|                  | GD-11       | Baiyedancong 3 (super level)                              |
|                  | GD-12 (GD8) | Dancong Duck excrement fragrance 1                        |
|                  | GD-13       | Dancong Duck excrement fragrance 2                        |
|                  | GD-14       | Dancong Duck excrement fragrance 3                        |
|                  | GD-15       | Baiyedancong                                              |
| Taiwan, China    | TW-1 (TW1)  | Oolong Tea (refreshing fragrance)                         |
|                  | TW-2        | Oolong Tea (refreshing fragrance)                         |
|                  | TW-3        | Oolong Tea (refreshing fragrance)                         |
|                  | TW-4        | Oolong Tea (refreshing fragrance)                         |
|                  | TW-5 (TW2)  | Dongding Oolong Tea                                       |
|                  | TW-6        | Dongding Oolong Tea                                       |
|                  | TW-7        | Dongding Oolong Tea                                       |
|                  | TW-8 (TW3)  | Gaoshancha                                                |
|                  | TW-9 (TW4)  | Dongfangmeiren tea (Canned)                               |
|                  | TW-10 (TW5) | Dongfangmeiren tea (Bagged)                               |
|                  | TW-11       | Dongding Oolong Tea                                       |

|                 |              |                                                  |
|-----------------|--------------|--------------------------------------------------|
|                 | TW-12 (TW6)  | Baozhong Tea                                     |
|                 | TW-13        | Baozhong Tea                                     |
|                 | TW-14        | Baozhong Tea                                     |
|                 | TW-15        | Baozhong Tea                                     |
|                 | TW-16        | Baozhong Tea                                     |
| Hubei, China    | HB-1 (HB1)   | Oolong Tea                                       |
|                 | ZJ-1 (ZJ1)   | Jinguanyin (refreshing fragrance)                |
|                 | ZJ-2 (ZJ2)   | Qilan                                            |
| Zhejiang, China | ZJ-3 (ZJ3)   | Meizhan                                          |
|                 | ZJ-4 (ZJ4)   | Shuixian                                         |
|                 | ZJ-5 (ZJ5)   | Rougui                                           |
|                 | SC-1 (SC1)   | Oolong Tea (refreshing fragrance, super level )  |
| Sichuan, China  | SC-2 (SC2)   | Oolong Tea (refreshing fragrance, second level ) |
|                 | SC-3 (SC3)   | Tanbei Oolong Tea                                |
|                 | JP-1 (JP1)   | Japanese market (Chunxun)                        |
|                 | JP-2 (JP2)   | Japanese market (Flower)                         |
|                 | JP-3 (JP3)   | Japanese market (Fangkou)                        |
|                 | JP-4 (JP4)   | Japanese market (Shuang)                         |
| Japan           | JP-5         | Japanese market (Oolong Tea)                     |
|                 | JP-6 (JP5)   | Japanese market (Granular Oolong tea)            |
|                 | JP-7         | Japanese market (Gongqichafang)                  |
|                 | JP-8         | Japanese market (Xingyechun)                     |
|                 | JP-9         | Japanese market (Muchun)                         |
|                 | LK-1 (LK1)   | Sri Lanka (I. S.B. experts)                      |
| Sri Lanka       | LK-2 (LK2)   | Sri Lanka (Ceylon oolong tea)                    |
|                 | LK-3         | Sri Lanka market                                 |
|                 | LK-4         | Sri Lanka market                                 |
|                 | MM-1 (MM1)   | Myanmar market (High mountain Oolong tea)        |
|                 | MM-2 (MM2)   | Myanmar market                                   |
| Myanmar         | MM-3 (MM3)   | Myanmar market                                   |
|                 | MM-4 (MM4)   | Myanmar market (High mountain Oolong tea)        |
|                 | MM-5 (MM5)   | Myanmar market                                   |
|                 | AUS-1 (AUS1) | Australian market (Dongdingwulong, black)        |
| Australia       | AUS-2 (AUS2) | Australian market (Oolong tea, strong fragrance) |
|                 | GER-1 (GER1) | German market (Oolong tea, Fancy Oolong)         |
|                 | GER-2 (GER2) | German market (Oolong tea)                       |
| Germany         | GER-3 (GER3) | German market (Oolong tea)                       |
|                 | GER-4 (GER4) | German market (Oolong tea)                       |
|                 | GER-5        | German market (bag brewing Oolong tea)           |
|                 | KR-1 (KR1)   | Korean market (refreshing fragrance, Oolong tea) |
| Korea           | KR-2 (KR2)   | Korean market (refreshing fragrance, Oolong tea) |
|                 | THA-1 (THA1) | Thailand market (strong fragrance, Oolong tea)   |
| Thailand        | THA-2 (THA2) | Thailand market (strong fragrance, Oolong tea)   |
|                 | THA-3 (THA3) | Thailand market (strong fragrance, Oolong tea)   |

**Table S2 The frequency of use of descriptors in Oolong tea in different regions**

| Sensory attributes | Descriptors                  | Number of samples using descriptions / piece | The frequency of use of descriptions in samples / % |
|--------------------|------------------------------|----------------------------------------------|-----------------------------------------------------|
| Appearance         | Tight and heavy              | 26                                           | 39.4                                                |
|                    | Round and tight              | 19                                           | 28.8                                                |
|                    | Bold                         | 9                                            | 13.6                                                |
|                    | Coarse and loose             | 9                                            | 13.6                                                |
|                    | Heavy                        | 7                                            | 10.6                                                |
|                    | Short and broken             | 2                                            | 3                                                   |
|                    | Mixed                        | 1                                            | 1.5                                                 |
|                    | Slightly tippy               | 1                                            | 1.5                                                 |
|                    | Pie                          | 1                                            | 1.5                                                 |
| Infusion color     | Orange red                   | 35                                           | 53                                                  |
|                    | Honey yellow                 | 23                                           | 34.8                                                |
|                    | Golden yellow                | 3                                            | 4.5                                                 |
|                    | Dull red                     | 2                                            | 3                                                   |
|                    | Auburn red                   | 1                                            | 1.5                                                 |
|                    | Orange                       | 1                                            | 1.5                                                 |
|                    | Honey green                  | 1                                            | 1.5                                                 |
|                    | Flowery aroma                | 45                                           | 68.2                                                |
|                    | Fruity aroma                 | 26                                           | 39.4                                                |
| Aroma              | Clean and refreshing         | 26                                           | 39.4                                                |
|                    | Roasted                      | 21                                           | 31.8                                                |
|                    | Honey aroma                  | 2                                            | 3                                                   |
|                    | Sweet aroma                  | 2                                            | 3                                                   |
|                    | Milky aroma                  | 1                                            | 1.5                                                 |
|                    | Astringent                   | 61                                           | 92.4                                                |
|                    | Bitterness                   | 53                                           | 80.3                                                |
|                    | Umami                        | 34                                           | 51.5                                                |
|                    | Mellow and thick             | 29                                           | 43.9                                                |
| Taste              | Sweet after taste            | 28                                           | 42.4                                                |
|                    | Heavy and thick              | 19                                           | 28.8                                                |
|                    | Mellow                       | 17                                           | 25.8                                                |
|                    | Brisk and smooth             | 14                                           | 21.2                                                |
|                    | Mellow and sweet after taste | 5                                            | 7.6                                                 |
|                    | Coarse and astringent        | 2                                            | 3                                                   |
|                    | Clean and cool               | 1                                            | 1.5                                                 |
|                    | Stale taste                  | 1                                            | 1.5                                                 |

**Table S3 The quality characteristics of Oolong tea in different regions**

| Region | Appearance            | Infusion color    | Aroma              | Taste                                 |
|--------|-----------------------|-------------------|--------------------|---------------------------------------|
| GD     | Tight and heavy, more | Orange red, light | Strong and lasting | Heavy and thick, superior sweet after |

|     |                                                                         |                                         |                                                             |                                                                                                      |
|-----|-------------------------------------------------------------------------|-----------------------------------------|-------------------------------------------------------------|------------------------------------------------------------------------------------------------------|
|     | tight and heavy or approach tight and heavy                             | orange red or deep orange red           | flowery aroma or show flowery aroma, honey aroma            | taste, superior bitter-astringency                                                                   |
| MN  | Heavy, tight and heavy, more heavy or more tight and heavy              | Orange red, honey yellow or honey green | Clean and refreshing, flowery aroma                         | Mellow or mellow and thick, fresh and brisk, superior sweet after taste, inferior bitter-astringency |
| MB  | More bold or approach tight and heavy                                   | Orange red or deep orange red           | Flowery aroma, fruity aroma, roasted                        | Heavy and thick, inferior astringent, superior sweet after taste                                     |
| MX  | Round and tight or pie                                                  | Honey yellow                            | Clean and refreshing with flowery aroma                     | Mellow and sweet after taste, fresh and brisk, more superior astringent, superior sweet after taste  |
| TW  | Round and tight                                                         | Honey yellow or orange red              | Flowery and fruity aroma or roasted                         | Mellow or mellow and sweet after taste, brisk and smooth, superior sweet after taste                 |
| HB  | Round and tight                                                         | Golden yellow                           | Clean and refreshing                                        | More mellow and thick, litter astringent                                                             |
| ZJ  | Tight and heavy, more tight and heavy or bold                           | Honey yellow, orange red or auburn red  | Flowery and fruity aroma, roasted                           | Mellow and thick, brisk and smooth ,or heavy and thick, litter astringent                            |
| SC  | Round and tight or tight and heavy                                      | Golden yellow or orange red             | Clean and refreshing, flowery and fruity aroma, roasted     | More heavy and thick or approach mellow and thick, more superior astringent                          |
| JP  | More tight and heavy, approach tight and heavy or more coarse and loose | Honey yellow, orange red or orange      | Clean and refreshing, flowery aroma                         | More mellow and thick, more brisk and smooth, superior umami, inferior bitter-astringency            |
| MM  | Round and tight                                                         | Honey yellow                            | Clean and refreshing with flowery aroma                     | Mellow and thick, brisk and smooth, inferior bitter-astringency                                      |
| LK  | More coarse and loose                                                   | Orange red                              | Roasted with sweet aroma                                    | Approach mellow and thick, coarse and astringent, clean and cool, inferior umami                     |
| GER | Round and tight,short and broken or mixed, some slightly tippy          | Orange red, honey yellow                | Clean and refreshing, honey aroma, flowery and fruity aroma | Mellow, more mellow and thick or approach mellow and thick                                           |
| AUS | Tight and heavy, more tight                                             | Honey yellow or orange red              | Flowery and fruity aroma or roasted                         | Approach mellow and thick                                                                            |
| KR  | Approach tight and heavy or less tight and heavy                        | Orange red or honey yellow              | Flowery and fruity aroma                                    | Mellow and thick or more mellow and thick                                                            |
| THA | Coarse and loose                                                        | Dull red                                | Roasted                                                     | Approach mellow and thick, more superior bitter, coarse and astringent                               |

Notes: MN, southern Fujian, China; MB, northern Fujian, China; MX, western Fujian, China; GD, Guangdong, China; TW, Taiwan, China; HB, Hubei, China; ZJ, Zhejiang, China; SC, Sichuan, China; JP, Japan; LK, Sri Lanka; MM, Myanmar; AUS, Australia; GER, Germany; KR, Korea; THA, Thailand.

**Table S4 Contents of phytochemical components in Oolong tea from different regions (mean  $\pm$  SD)**

| Number | Water<br>extract/% | Free amino<br>acids/% | Theanine/%      | Tea<br>polyphenols/% | Caffeine/%      | EGC/%           | C/%             |
|--------|--------------------|-----------------------|-----------------|----------------------|-----------------|-----------------|-----------------|
| GD1    | 49.36 $\pm$ 1.07   | 1.30 $\pm$ 0.06       | 0.84 $\pm$ 0.06 | 20.75 $\pm$ 1.11     | 3.06 $\pm$ 0.08 | 1.42 $\pm$ 0.08 | 0.03 $\pm$ 0.00 |
| GD2    | 50.55 $\pm$ 1.18   | 1.43 $\pm$ 0.06       | 1.03 $\pm$ 0.06 | 19.97 $\pm$ 0.78     | 3.87 $\pm$ 0.12 | 1.78 $\pm$ 0.12 | 0.05 $\pm$ 0.01 |
| GD3    | 50.89 $\pm$ 1.32   | 1.25 $\pm$ 0.02       | 1.02 $\pm$ 0.05 | 23.18 $\pm$ 0.66     | 4.22 $\pm$ 0.10 | 1.89 $\pm$ 0.10 | 0.06 $\pm$ 0.02 |
| GD4    | 48.99 $\pm$ 1.10   | 1.25 $\pm$ 0.11       | 1.25 $\pm$ 0.05 | 21.97 $\pm$ 0.49     | 4.36 $\pm$ 0.18 | 1.27 $\pm$ 0.18 | 0.05 $\pm$ 0.01 |
| GD5    | 48.10 $\pm$ 1.07   | 1.26 $\pm$ 0.11       | 0.83 $\pm$ 0.04 | 19.57 $\pm$ 0.69     | 3.30 $\pm$ 0.26 | 1.30 $\pm$ 0.26 | 0.05 $\pm$ 0.01 |
| GD6    | 37.39 $\pm$ 1.16   | 0.69 $\pm$ 0.04       | 0.28 $\pm$ 0.08 | 8.52 $\pm$ 0.45      | 2.77 $\pm$ 0.60 | 0.28 $\pm$ 0.06 | 0.03 $\pm$ 0.00 |
| GD7    | 48.67 $\pm$ 0.25   | 0.92 $\pm$ 0.01       | 0.54 $\pm$ 0.05 | 20.50 $\pm$ 1.42     | 2.98 $\pm$ 0.20 | 1.64 $\pm$ 0.02 | 0.05 $\pm$ 0.01 |
| GD8    | 48.13 $\pm$ 0.42   | 0.87 $\pm$ 0.03       | 0.35 $\pm$ 0.06 | 23.17 $\pm$ 0.68     | 3.62 $\pm$ 0.21 | 1.65 $\pm$ 0.21 | 0.05 $\pm$ 0.00 |
| MN1    | 47.27 $\pm$ 0.73   | 1.39 $\pm$ 0.06       | 0.86 $\pm$ 0.05 | 14.83 $\pm$ 0.70     | 2.45 $\pm$ 0.10 | 3.45 $\pm$ 0.11 | 0.05 $\pm$ 0.00 |
| MN2    | 41.05 $\pm$ 0.94   | 1.19 $\pm$ 0.16       | 0.43 $\pm$ 0.07 | 16.20 $\pm$ 0.67     | 1.50 $\pm$ 0.11 | 3.84 $\pm$ 0.11 | 0.07 $\pm$ 0.00 |
| MN3    | 43.78 $\pm$ 0.40   | 1.69 $\pm$ 0.05       | 0.96 $\pm$ 0.05 | 16.35 $\pm$ 1.59     | 2.19 $\pm$ 0.10 | 3.28 $\pm$ 0.11 | 0.05 $\pm$ 0.00 |
| MN4    | 43.17 $\pm$ 0.28   | 1.02 $\pm$ 0.05       | 0.24 $\pm$ 0.04 | 13.7 $\pm$ 0.82      | 1.60 $\pm$ 0.13 | 3.78 $\pm$ 0.13 | 0.04 $\pm$ 0.01 |
| MN5    | 44.65 $\pm$ 0.69   | 1.50 $\pm$ 0.14       | 0.59 $\pm$ 0.01 | 15.49 $\pm$ 0.82     | 2.06 $\pm$ 0.06 | 2.54 $\pm$ 0.06 | 0.04 $\pm$ 0.01 |
| MN6    | 44.88 $\pm$ 1.62   | 1.12 $\pm$ 0.08       | 0.25 $\pm$ 0.05 | 14.72 $\pm$ 0.57     | 1.81 $\pm$ 0.16 | 3.10 $\pm$ 0.16 | 0.04 $\pm$ 0.01 |
| MN7    | 44.60 $\pm$ 1.68   | 1.50 $\pm$ 0.15       | 0.74 $\pm$ 0.02 | 14.35 $\pm$ 1.29     | 2.23 $\pm$ 0.15 | 4.00 $\pm$ 0.15 | 0.03 $\pm$ 0.01 |
| MB1    | 43.25 $\pm$ 1.24   | 1.45 $\pm$ 0.16       | 0.69 $\pm$ 0.06 | 15.08 $\pm$ 0.41     | 3.05 $\pm$ 0.15 | 1.79 $\pm$ 0.15 | 0.06 $\pm$ 0.01 |
| MB2    | 40.62 $\pm$ 1.82   | 0.80 $\pm$ 0.01       | 0.51 $\pm$ 0.03 | 13.41 $\pm$ 0.75     | 3.06 $\pm$ 0.14 | 1.81 $\pm$ 0.14 | 0.03 $\pm$ 0.00 |
| MB3    | 41.85 $\pm$ 1.74   | 0.81 $\pm$ 0.07       | 0.10 $\pm$ 0.03 | 13.76 $\pm$ 0.49     | 2.81 $\pm$ 0.18 | 1.92 $\pm$ 0.18 | 0.03 $\pm$ 0.00 |
| MB4    | 41.80 $\pm$ 1.83   | 0.62 $\pm$ 0.05       | 0.36 $\pm$ 0.04 | 14.04 $\pm$ 0.55     | 3.24 $\pm$ 0.15 | 2.10 $\pm$ 0.15 | 0.02 $\pm$ 0.00 |
| MB5    | 40.59 $\pm$ 1.61   | 0.57 $\pm$ 0.02       | 0.43 $\pm$ 0.09 | 14.39 $\pm$ 0.58     | 2.86 $\pm$ 0.16 | 1.30 $\pm$ 0.16 | 0.03 $\pm$ 0.01 |
| MB6    | 40.67 $\pm$ 1.53   | 0.80 $\pm$ 0.06       | 0.20 $\pm$ 0.00 | 14.30 $\pm$ 0.73     | 2.28 $\pm$ 0.15 | 2.55 $\pm$ 0.15 | 0.02 $\pm$ 0.00 |
| MB7    | 40.20 $\pm$ 1.30   | 0.60 $\pm$ 0.03       | 0.05 $\pm$ 0.01 | 13.11 $\pm$ 0.63     | 2.41 $\pm$ 0.17 | 1.39 $\pm$ 0.17 | 0.03 $\pm$ 0.00 |
| MB8    | 38.13 $\pm$ 0.74   | 0.56 $\pm$ 0.03       | 0.04 $\pm$ 0.00 | 13.39 $\pm$ 0.77     | 3.03 $\pm$ 0.15 | 1.38 $\pm$ 0.15 | 0.05 $\pm$ 0.00 |
| MX1    | 43.83 $\pm$ 0.56   | 2.59 $\pm$ 0.24       | 1.41 $\pm$ 0.16 | 11.87 $\pm$ 0.71     | 1.92 $\pm$ 0.14 | 3.46 $\pm$ 0.14 | 0.05 $\pm$ 0.00 |
| MX2    | 44.26 $\pm$ 0.87   | 2.84 $\pm$ 0.19       | 1.44 $\pm$ 0.09 | 12.54 $\pm$ 0.51     | 2.50 $\pm$ 0.21 | 3.27 $\pm$ 0.21 | 0.05 $\pm$ 0.00 |
| MX3    | 43.44 $\pm$ 0.91   | 2.77 $\pm$ 0.15       | 1.83 $\pm$ 0.12 | 10.66 $\pm$ 0.54     | 1.55 $\pm$ 0.25 | 1.38 $\pm$ 0.25 | 0.04 $\pm$ 0.00 |
| MX4    | 43.17 $\pm$ 0.57   | 2.47 $\pm$ 0.11       | 1.37 $\pm$ 0.16 | 9.74 $\pm$ 0.52      | 1.97 $\pm$ 0.20 | 3.39 $\pm$ 0.20 | 0.04 $\pm$ 0.01 |
| MX5    | 49.29 $\pm$ 0.68   | 1.00 $\pm$ 0.09       | 0.21 $\pm$ 0.02 | 19.28 $\pm$ 0.51     | 2.17 $\pm$ 0.26 | 4.58 $\pm$ 1.26 | 0.05 $\pm$ 0.02 |
| TW1    | 40.51 $\pm$ 0.96   | 2.04 $\pm$ 0.16       | 0.29 $\pm$ 0.03 | 11.76 $\pm$ 0.61     | 2.23 $\pm$ 0.23 | 3.08 $\pm$ 1.23 | 0.04 $\pm$ 0.00 |
| TW2    | 43.02 $\pm$ 1.17   | 1.85 $\pm$ 0.09       | 0.74 $\pm$ 0.10 | 12.80 $\pm$ 2.17     | 2.58 $\pm$ 0.23 | 2.78 $\pm$ 0.23 | 0.04 $\pm$ 0.00 |
| TW3    | 40.57 $\pm$ 1.36   | 1.29 $\pm$ 0.12       | 0.34 $\pm$ 0.07 | 14.88 $\pm$ 1.11     | 2.04 $\pm$ 0.24 | 3.43 $\pm$ 0.24 | 0.05 $\pm$ 0.01 |
| TW4    | 41.39 $\pm$ 1.99   | 2.14 $\pm$ 0.16       | 0.54 $\pm$ 0.10 | 13.46 $\pm$ 0.60     | 2.62 $\pm$ 0.19 | 4.45 $\pm$ 1.19 | 0.07 $\pm$ 0.02 |
| TW5    | 40.05 $\pm$ 1.79   | 3.89 $\pm$ 0.12       | 0.57 $\pm$ 0.21 | 13.58 $\pm$ 1.19     | 2.15 $\pm$ 0.15 | 4.27 $\pm$ 0.15 | 0.05 $\pm$ 0.01 |
| TW6    | 42.00 $\pm$ 2.20   | 3.41 $\pm$ 0.13       | 0.73 $\pm$ 0.12 | 13.21 $\pm$ 1.84     | 2.54 $\pm$ 0.11 | 4.86 $\pm$ 1.11 | 0.07 $\pm$ 0.01 |
| HB     | 45.00 $\pm$ 2.19   | 4.28 $\pm$ 0.10       | 2.44 $\pm$ 0.16 | 12.38 $\pm$ 0.70     | 2.24 $\pm$ 0.09 | 3.45 $\pm$ 0.09 | 0.04 $\pm$ 0.00 |
| ZJ1    | 43.39 $\pm$ 1.38   | 2.35 $\pm$ 0.07       | 1.32 $\pm$ 0.41 | 14.75 $\pm$ 1.64     | 1.68 $\pm$ 0.16 | 2.77 $\pm$ 0.16 | 0.03 $\pm$ 0.01 |
| ZJ2    | 42.35 $\pm$ 1.74   | 0.65 $\pm$ 0.10       | 0.34 $\pm$ 0.14 | 10.86 $\pm$ 1.06     | 1.78 $\pm$ 0.09 | 1.17 $\pm$ 0.09 | 0.03 $\pm$ 0.00 |
| ZJ3    | 39.49 $\pm$ 2.12   | 0.47 $\pm$ 0.01       | 0.10 $\pm$ 0.01 | 9.38 $\pm$ 1.55      | 1.75 $\pm$ 0.12 | 0.66 $\pm$ 0.12 | 0.03 $\pm$ 0.00 |
| ZJ4    | 43.65 $\pm$ 1.91   | 0.81 $\pm$ 0.02       | 0.23 $\pm$ 0.03 | 14.65 $\pm$ 2.04     | 2.84 $\pm$ 0.16 | 2.81 $\pm$ 0.16 | 0.04 $\pm$ 0.00 |
| ZJ5    | 44.90 $\pm$ 1.25   | 1.29 $\pm$ 0.16       | 0.57 $\pm$ 0.12 | 15.68 $\pm$ 0.89     | 3.10 $\pm$ 0.12 | 1.75 $\pm$ 0.12 | 0.03 $\pm$ 0.00 |

|      |            |           |           |            |           |           |           |
|------|------------|-----------|-----------|------------|-----------|-----------|-----------|
| SC1  | 44.44±1.64 | 3.94±0.41 | 2.03±0.11 | 14.46±1.73 | 2.82±0.13 | 3.72±0.13 | 0.03±0.00 |
| SC2  | 43.21±1.87 | 3.49±0.14 | 1.85±0.09 | 12.17±1.04 | 2.79±0.10 | 3.37±0.11 | 0.03±0.00 |
| SC3  | 42.18±1.15 | 1.05±0.09 | 0.25±0.08 | 11.12±0.59 | 2.10±0.07 | 1.97±0.07 | 0.03±0.00 |
| JP1  | 45.88±1.16 | 1.82±0.03 | 0.61±0.34 | 18.62±0.75 | 2.93±0.10 | 3.94±0.11 | 0.11±0.03 |
| JP2  | 50.59±1.73 | 3.03±0.12 | 1.82±0.21 | 21.51±0.6  | 3.52±0.21 | 4.20±0.21 | 0.08±0.03 |
| JP3  | 49.19±1.48 | 2.17±0.10 | 1.03±0.26 | 15.64±0.77 | 2.93±0.12 | 3.86±0.12 | 0.04±0.01 |
| JP4  | 45.49±1.13 | 1.11±0.09 | 0.43±0.21 | 14.56±0.72 | 2.76±0.16 | 2.06±0.16 | 0.02±0.01 |
| JP5  | 45.82±1.71 | 2.58±0.08 | 0.73±0.23 | 12.69±0.78 | 3.06±0.41 | 1.82±0.41 | 0.21±0.08 |
| MM1  | 46.03±1.38 | 1.99±0.34 | 1.02±0.02 | 16.88±0.67 | 2.20±0.14 | 3.57±0.14 | 0.05±0.00 |
| MM2  | 45.79±1.43 | 5.39±0.21 | 3.60±0.21 | 14.61±1.25 | 2.32±0.09 | 3.58±0.09 | 0.06±0.00 |
| MM3  | 47.15±1.45 | 5.13±0.26 | 3.58±0.19 | 15.03±0.92 | 2.45±0.03 | 3.64±0.03 | 0.05±0.01 |
| MM4  | 46.91±1.52 | 4.87±0.21 | 3.54±0.25 | 14.31±0.89 | 2.30±0.12 | 3.56±0.12 | 0.05±0.00 |
| MM5  | 46.45±1.68 | 5.16±0.23 | 3.34±0.23 | 13.62±1.13 | 2.23±0.10 | 2.88±0.11 | 0.03±0.00 |
| LK1  | 45.74±1.10 | 0.86±0.12 | 0.52±0.09 | 11.96±0.47 | 3.17±0.09 | 0.68±0.09 | 0.07±0.00 |
| LK2  | 52.67±1.31 | 0.70±0.01 | 0.34±0.07 | 16.79±0.41 | 2.93±0.08 | 1.70±0.08 | 0.05±0.00 |
| AUS1 | 43.11±1.05 | 0.99±0.19 | 0.94±0.08 | 15.61±0.39 | 1.51±0.34 | 1.53±0.34 | 0.06±0.00 |
| AUS2 | 39.40±1.38 | 0.67±0.25 | 0.78±0.09 | 11.85±1.11 | 1.99±0.21 | 1.32±0.21 | 0.06±0.00 |
| GER1 | 43.77±1.13 | 1.60±0.23 | 0.36±0.02 | 12.51±1.05 | 2.90±0.26 | 0.67±0.03 | 0.08±0.02 |
| GER2 | 47.08±1.17 | 1.30±0.29 | 0.98±0.05 | 15.59±0.56 | 1.91±0.21 | 2.63±0.21 | 0.08±0.03 |
| GER3 | 50.04±1.36 | 1.55±0.27 | 1.34±0.25 | 12.66±0.54 | 3.02±0.23 | 0.37±0.01 | 0.07±0.02 |
| GER4 | 42.10±1.99 | 1.50±0.28 | 1.08±0.03 | 10.88±0.51 | 2.38±0.12 | 0.19±0.01 | 0.04±0.02 |
| KR1  | 40.75±1.79 | 2.94±0.19 | 0.83±0.08 | 9.43±0.48  | 2.07±0.21 | 1.24±0.05 | 0.04±0.00 |
| KR2  | 43.74±2.20 | 2.25±0.32 | 0.82±0.09 | 11.26±0.53 | 1.85±0.19 | 3.08±0.23 | 0.05±0.00 |
| THA1 | 49.59±0.42 | 1.60±0.25 | 0.56±0.05 | 16.85±0.70 | 2.44±0.25 | 1.99±0.29 | 0.08±0.01 |
| THA2 | 47.13±0.73 | 1.11±0.28 | 0.59±0.02 | 14.76±0.53 | 2.51±0.23 | 0.82±0.07 | 0.09±0.00 |
| THA3 | 36.59±0.94 | 0.41±0.19 | 0.06±0.00 | 6.78±0.98  | 1.45±0.09 | 0.32±0.08 | 0.03±0.00 |

**Continued table S4 Contents of phytochemical components in Oolong tea from different regions (mean ± SD)**

| Number | EC/%      | EGCG/%    | ECG/%     | Simple catechins/% | Ester catechins/% | Total catechins/% |
|--------|-----------|-----------|-----------|--------------------|-------------------|-------------------|
| GD1    | 0.52±0.03 | 5.54±0.80 | 1.03±0.03 | 1.98±0.52          | 6.56±0.12         | 8.54±0.87         |
| GD2    | 0.48±0.01 | 6.86±0.84 | 1.35±0.07 | 2.31±0.50          | 8.22±1.10         | 10.52±1.23        |
| GD3    | 0.52±0.04 | 7.52±0.74 | 1.26±0.01 | 2.48±0.43          | 8.78±1.18         | 11.26±1.24        |
| GD4    | 0.46±0.02 | 7.34±0.89 | 1.11±0.01 | 1.78±0.46          | 8.46±1.26         | 10.24±2.38        |
| GD5    | 0.58±0.04 | 5.94±0.98 | 1.28±0.04 | 1.93±0.63          | 7.22±1.6          | 9.15±0.14         |
| GD6    | 0.23±0.06 | 0.20±0.00 | 0.17±0.04 | 0.54±0.59          | 0.36±0.02         | 0.90±0.26         |
| GD7    | 0.73±0.08 | 5.51±0.95 | 1.26±0.08 | 2.42±0.83          | 6.77±0.21         | 9.19±0.14         |
| GD8    | 0.62±0.09 | 6.44±1.06 | 1.21±0.05 | 2.32±0.60          | 7.65±1.14         | 9.97±0.14         |
| MN1    | 0.81±0.07 | 3.99±0.86 | 0.61±0.06 | 4.31±0.58          | 4.60±0.61         | 8.91±0.21         |
| MN2    | 0.84±0.06 | 3.67±0.98 | 0.52±0.05 | 4.74±0.63          | 4.19±0.16         | 8.94±1.64         |
| MN3    | 0.79±0.06 | 3.14±0.84 | 0.46±0.07 | 4.11±0.56          | 3.60±0.13         | 7.71±1.66         |
| MN4    | 1.12±0.12 | 4.06±1.02 | 0.84±0.05 | 4.94±1.09          | 4.90±0.06         | 9.84±1.55         |
| MN5    | 0.82±0.03 | 2.83±0.90 | 0.53±0.04 | 3.39±0.92          | 3.36±1.16         | 6.75±1.35         |
| MN6    | 0.82±0.06 | 3.36±0.84 | 0.52±0.01 | 3.96±1.15          | 3.88±0.75         | 7.84±1.06         |



|      |           |           |           |           |           |            |
|------|-----------|-----------|-----------|-----------|-----------|------------|
| MN7  | 1.38±0.01 | 3.13±0.93 | 0.72±0.05 | 5.40±0.64 | 3.85±0.95 | 9.25±2.39  |
| MB1  | 1.18±0.08 | 3.47±0.67 | 1.09±0.20 | 3.03±0.58 | 4.56±0.84 | 7.59±0.97  |
| MB2  | 1.19±0.05 | 3.50±0.98 | 1.09±0.06 | 3.03±0.63 | 4.59±0.58 | 7.62±1.14  |
| MB3  | 0.71±0.09 | 2.17±0.93 | 0.46±0.23 | 2.65±0.60 | 2.62±0.45 | 5.28±1.48  |
| MB4  | 0.74±0.09 | 3.57±1.03 | 0.73±0.23 | 2.86±0.59 | 4.30±0.96 | 7.16±1.89  |
| MB5  | 0.59±0.07 | 2.76±0.77 | 0.65±0.24 | 1.92±0.08 | 3.41±0.75 | 5.34±1.55  |
| MB6  | 0.47±0.09 | 3.22±0.12 | 0.79±0.19 | 3.05±0.62 | 4.01±0.87 | 7.06±1.49  |
| MB7  | 0.56±0.06 | 2.26±0.21 | 0.60±0.15 | 1.97±0.61 | 2.86±0.85 | 4.83±0.62  |
| MB8  | 0.59±0.07 | 2.60±0.19 | 0.76±0.11 | 2.02±0.60 | 3.36±0.94 | 5.38±1.84  |
| MX1  | 0.73±0.06 | 3.15±0.25 | 0.41±0.09 | 4.24±0.74 | 3.56±0.61 | 7.80±1.48  |
| MX2  | 0.86±0.07 | 3.76±0.23 | 0.51±0.16 | 4.18±0.56 | 4.27±0.25 | 8.45±1.05  |
| MX3  | 0.55±0.08 | 3.32±0.29 | 0.51±0.09 | 1.97±0.87 | 3.83±0.27 | 5.80±1.26  |
| MX4  | 0.71±0.18 | 2.36±0.27 | 0.29±0.02 | 4.14±0.91 | 2.65±0.26 | 6.79±0.59  |
| MX5  | 1.89±0.01 | 5.00±0.28 | 1.32±0.16 | 6.52±0.57 | 6.32±1.23 | 12.84±2.71 |
| TW1  | 0.75±0.07 | 3.06±0.19 | 0.42±0.12 | 3.86±0.68 | 3.47±0.23 | 7.34±1.68  |
| TW2  | 0.83±0.09 | 3.21±0.32 | 0.48±0.13 | 3.65±0.96 | 3.69±0.24 | 7.34±1.26  |
| TW3  | 0.94±0.01 | 3.98±0.25 | 0.53±0.10 | 4.42±0.73 | 4.51±0.19 | 8.94±1.57  |
| TW4  | 1.02±0.14 | 3.63±0.25 | 0.65±0.07 | 5.54±0.74 | 4.28±0.15 | 9.83±1.25  |
| TW5  | 1.01±0.02 | 4.01±0.30 | 0.58±0.10 | 5.33±0.58 | 4.59±0.11 | 9.92±1.35  |
| TW6  | 1.26±0.07 | 4.35±0.28 | 0.60±0.21 | 6.19±0.75 | 4.94±0.89 | 11.13±1.33 |
| HB   | 0.90±0.06 | 2.86±0.19 | 0.40±0.12 | 4.39±0.74 | 3.26±0.86 | 7.65±1.98  |
| ZJ1  | 0.62±0.05 | 2.96±0.25 | 0.42±0.16 | 3.41±0.61 | 3.38±0.99 | 6.8±1.02   |
| ZJ2  | 0.39±0.04 | 2.46±0.22 | 0.42±0.01 | 1.59±0.75 | 2.88±0.12 | 4.47±0.96  |
| ZJ3  | 0.26±0.04 | 1.02±0.27 | 0.23±0.04 | 0.95±0.57 | 1.25±0.16 | 2.20±0.27  |
| ZJ4  | 1.18±0.23 | 3.93±0.23 | 0.94±0.09 | 4.03±0.71 | 4.87±1.12 | 8.89±1.82  |
| ZJ5  | 0.72±0.03 | 3.39±0.24 | 0.69±0.03 | 2.50±0.6  | 4.08±1.13 | 6.57±1.24  |
| SC1  | 0.87±0.04 | 3.05±0.38 | 0.44±0.12 | 4.63±0.6  | 3.49±0.18 | 8.12±1.31  |
| SC2  | 0.80±0.08 | 2.86±0.14 | 0.41±0.10 | 4.20±0.58 | 3.27±0.77 | 7.47±1.40  |
| SC3  | 0.45±0.02 | 1.82±0.26 | 0.3±0.09  | 2.45±0.57 | 2.12±0.61 | 4.57±1.26  |
| JP1  | 1.29±0.06 | 5.86±0.14 | 0.97±0.08 | 5.34±0.68 | 6.84±1.21 | 12.18±2.35 |
| JP2  | 1.76±0.14 | 5.12±0.57 | 1.39±0.34 | 6.04±0.63 | 6.51±1.12 | 12.55±2.26 |
| JP3  | 1.31±0.07 | 3.92±0.19 | 0.68±0.21 | 5.21±0.57 | 4.60±0.16 | 9.81±0.92  |
| JP4  | 1.51±0.06 | 2.48±0.56 | 1.00±0.26 | 3.59±0.19 | 3.48±0.41 | 7.08±1.34  |
| JP5  | 0.80±0.01 | 2.18±0.47 | 0.59±0.21 | 2.83±0.56 | 2.77±0.14 | 5.60±0.99  |
| MM1  | 1.00±0.03 | 3.94±0.61 | 0.59±0.23 | 4.62±0.47 | 4.54±0.69 | 9.16±1.07  |
| MM2  | 0.98±0.01 | 3.23±0.75 | 0.43±0.12 | 4.62±0.61 | 3.66±0.63 | 8.28±1.59  |
| MM3  | 0.94±0.06 | 3.20±0.68 | 0.43±0.21 | 4.63±0.75 | 3.64±0.12 | 8.26±1.33  |
| MM4  | 0.93±0.01 | 2.93±0.77 | 0.39±0.19 | 4.54±0.68 | 3.32±0.19 | 7.85±1.27  |
| MM5  | 0.75±0.03 | 2.55±0.86 | 0.35±0.25 | 3.66±0.77 | 2.89±0.89 | 6.56±1.17  |
| LK1  | 0.27±0.02 | 0.92±0.41 | 0.50±0.23 | 1.01±0.86 | 1.42±0.08 | 2.43±0.27  |
| LK2  | 0.86±0.08 | 3.08±1.05 | 0.99±0.29 | 2.61±0.41 | 4.07±0.34 | 6.68±1.35  |
| AUS1 | 0.77±0.09 | 2.22±0.82 | 0.58±0.27 | 2.36±1.05 | 2.80±0.21 | 5.16±1.03  |
| AUS2 | 0.46±0.09 | 1.72±0.35 | 0.45±0.28 | 1.84±0.62 | 2.17±0.26 | 4.01±1.12  |
| GER1 | 0.43±0.07 | 0.97±0.34 | 0.23±0.19 | 1.18±0.21 | 1.20±0.21 | 2.38±0.64  |

|      |           |           |           |           |           |           |
|------|-----------|-----------|-----------|-----------|-----------|-----------|
| GER2 | 0.97±0.02 | 4.17±1.16 | 0.80±0.32 | 3.68±1.26 | 4.97±0.23 | 8.65±1.03 |
| GER3 | 0.80±0.07 | 0.99±0.04 | 0.64±0.25 | 1.24±0.23 | 1.63±0.12 | 2.87±0.61 |
| GER4 | 0.54±0.04 | 0.48±0.01 | 0.38±0.25 | 0.77±0.22 | 0.86±0.21 | 1.62±0.19 |
| KR1  | 0.47±0.06 | 1.12±0.75 | 0.24±0.03 | 1.75±0.24 | 1.36±0.19 | 3.11±0.88 |
| KR2  | 0.92±0.08 | 1.97±0.49 | 0.31±0.08 | 4.04±0.23 | 2.28±0.25 | 6.32±0.53 |
| THA1 | 1.59±0.14 | 2.67±0.55 | 1.7±0.19  | 3.65±0.40 | 4.37±0.23 | 8.02±1.77 |
| THA2 | 1.44±0.08 | 1.25±0.08 | 1.87±0.25 | 2.35±0.26 | 3.12±0.29 | 5.47±0.53 |
| THA3 | 0.15±0.01 | 0.49±0.03 | 0.22±0.02 | 0.50±0.23 | 0.71±0.27 | 1.21±0.38 |

Notes: MN, Southern Fujian, China; MB, Northern Fujian, China; MX, Western Fujian, China; GD, Guangdong, China; TW, Taiwan, China; HB, Hubei, China; ZJ, Zhejiang, China; SC, Sichuan, China; JP, Japan; LK, Sri Lanka; MM, Myanmar; AUS, Australia; GER, Germany; KR, Korea; THA, Thailand.

**Table S5 DoT of phytochemical components of Oolong tea in different regions**

| Region                 | Theanine | Caffeine | EGC  | C    | EC   | EGCG | ECG  |
|------------------------|----------|----------|------|------|------|------|------|
| Guangdong, China       | 0.07     | 3.63     | 0.88 | 0.04 | 0.19 | 3.25 | 0.94 |
| Southern Fujian, China | 0.06     | 2.04     | 2.15 | 0.04 | 0.35 | 1.98 | 0.52 |
| Northern Fujian, China | 0.03     | 2.93     | 1.12 | 0.03 | 0.28 | 1.69 | 0.67 |
| Western Fujian, China  | 0.12     | 2.08     | 2.02 | 0.04 | 0.35 | 2.02 | 0.53 |
| Taiwan, China          | 0.05     | 2.43     | 2.39 | 0.04 | 0.36 | 2.13 | 0.47 |
| Hubei, China           | 0.23     | 2.31     | 2.17 | 0.03 | 0.33 | 1.64 | 0.35 |
| Zhejiang, China        | 0.05     | 2.30     | 1.15 | 0.03 | 0.23 | 1.58 | 0.47 |
| Sichuan, China         | 0.13     | 2.65     | 1.90 | 0.02 | 0.26 | 1.48 | 0.33 |
| Japan                  | 0.09     | 3.13     | 1.99 | 0.07 | 0.49 | 2.25 | 0.81 |
| Myanmar                | 0.29     | 2.37     | 2.16 | 0.04 | 0.34 | 1.82 | 0.38 |
| Sri Lanka              | 0.04     | 3.14     | 0.75 | 0.05 | 0.21 | 1.15 | 0.65 |
| Australia              | 0.08     | 1.80     | 0.89 | 0.05 | 0.23 | 1.13 | 0.45 |
| Germany                | 0.09     | 2.63     | 0.61 | 0.05 | 0.25 | 0.95 | 0.45 |
| Korea                  | 0.08     | 2.02     | 1.36 | 0.04 | 0.26 | 0.89 | 0.24 |
| Thailand               | 0.04     | 2.20     | 0.66 | 0.05 | 0.39 | 0.84 | 1.10 |
| Mean value             | 0.10     | 2.51     | 1.48 | 0.04 | 0.30 | 1.65 | 0.56 |
